# Supplementary material for: Mitchell-Riley syndrome iPSC exhibit reduced pancreatic endoderm differentiation due to an RFX6 mutation
Source: Oxford University Press journal article supplement (doi:10.1242/dev.194878), 2020-01-01
Supplement: dev194878supp1.pdf [file dev194878supp1.pdf]

# Information on the use of this interactive 3D-PDF

## Selection of structures

The top left panel contains buttons to show or hide (groups of) structures, or to make them transparent.

show   transparent   hide

## button example:

After a single click on a 3D structure, the structure will be highlighted and the name of the structure will appear below "Selected structure". With the buttons next to the structure name, the appearance of this structure can be changed. Clicking next to the 3D object will deselect the structure.

For more advanced selection options, right-click on the 3D model and choose: "Show Model Tree".

## Interaction with the 3D model

*Rotate:* Hold left mouse-button and move mouse.

*Zoom:* Hold right mouse-button and move mouse up or down.

*Translate:* Hold left and right mouse-buttons and move mouse.

## Selection of preset views

Click on a view button to display the preset view as shown on the button.

## Full screen mode

Enter full screen mode: *Ctrl +L*

Exit full screen mode: *Esc*

## Link to our website

Click on the link to visit our website.

## Technical Notes

This PDF file should be viewed in Adobe Acrobat Reader X or higher, available from <http://www.adobe.com/downloads>. 3D interaction is only possible on MS Windows or Mac OS. Javascript and playing of 3D content must be enabled.

Open *Edit* ⇒ *Preferences* to ensure the following:

- 1) In *3D & Multimedia*, enable *Enable playing of 3D content*
- 2) In *3D & Multimedia*, under *3D Tool Options*
  - *Open Model Tree on 3D Activation: Use Annotation's Settings*
  - *Default Toolbar State: Use Annotation's Settings*
  - *disable Show 3D Orientation Axis*
- 3) In *3D & Multimedia*, under *Auto-Degrade Options*
  - *Optimization Scheme for Low Framerate: None*
- 4) In *JavaScript*, under *JavaScript*
  - *enable Enable Acrobat JavaScript*

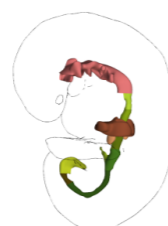

Overview

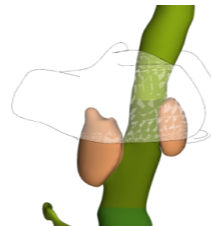

Lateral view

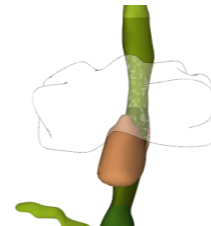

Ventral view

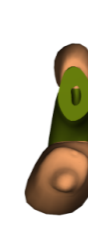

Cranial view

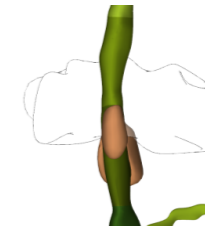

Dorsal view

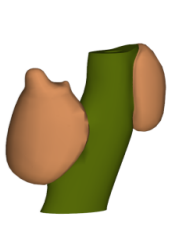

Detail

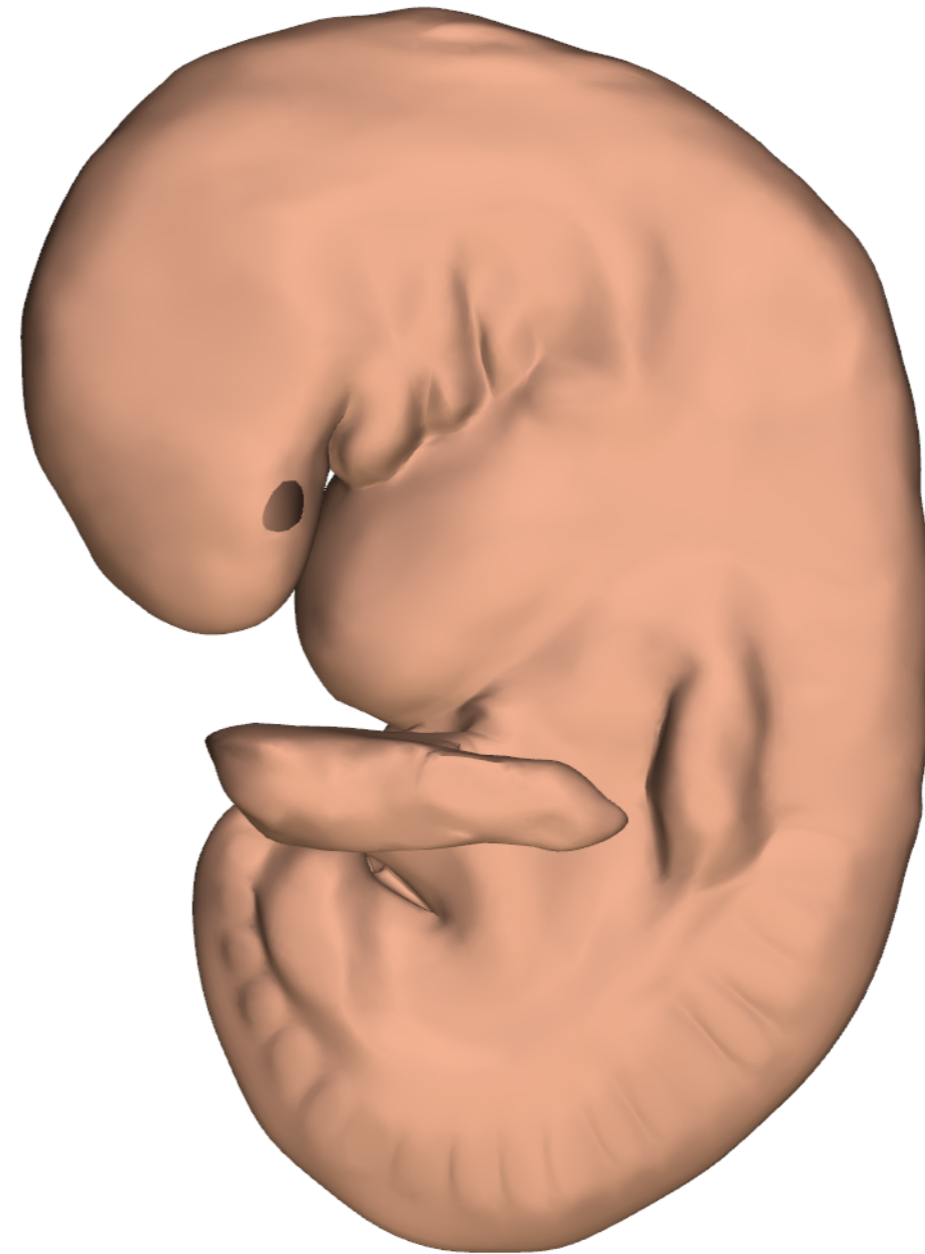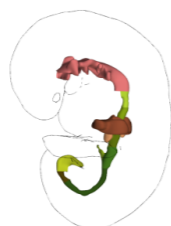

Overview

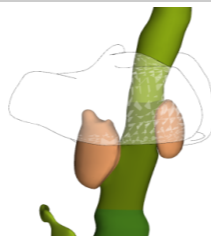

Lateral view

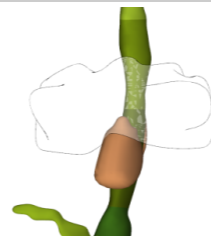

Ventral view

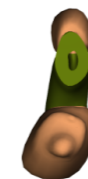

Cranial view

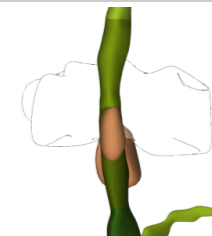

Dorsal view

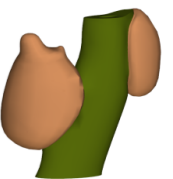

Detail

# Carnegie stage 14 (31-35 days, 5.2 mm) specimen 8314

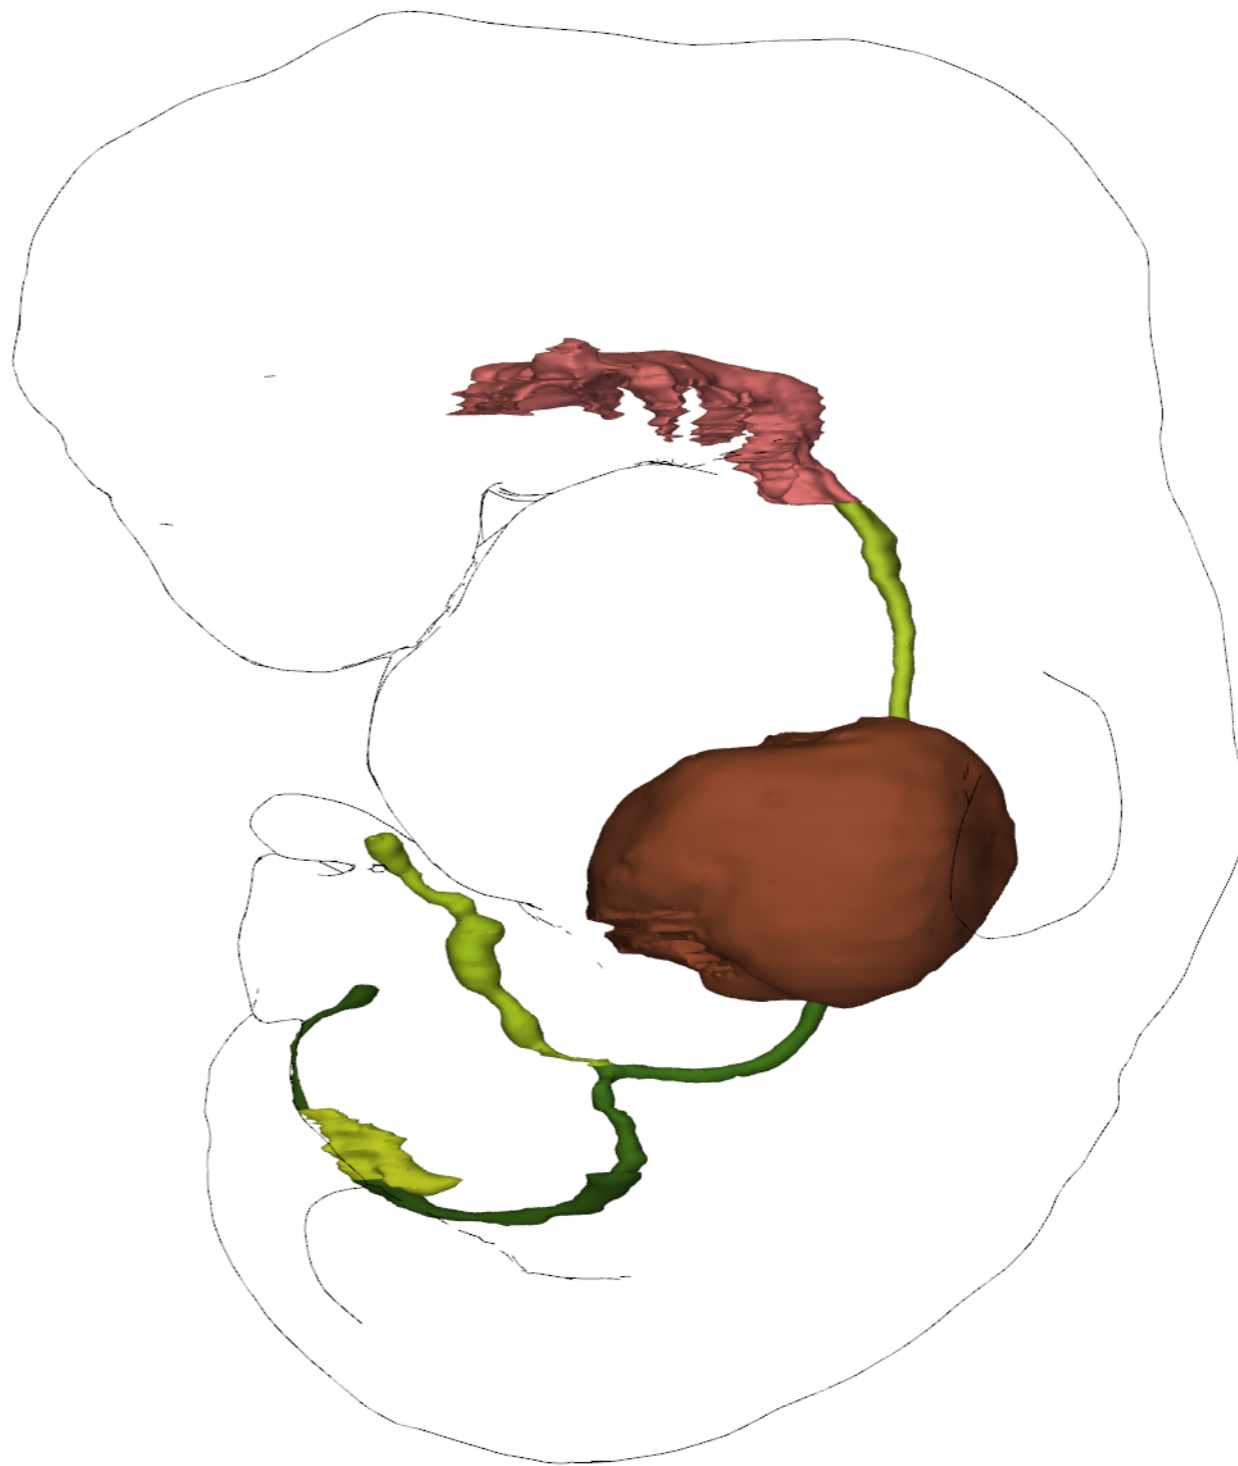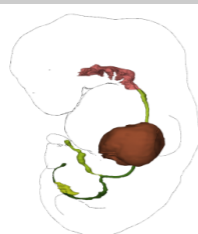

Overview

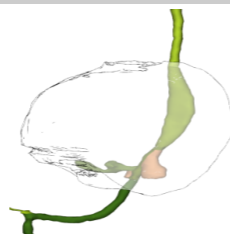

Lateral view

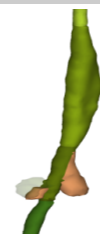

Ventral view

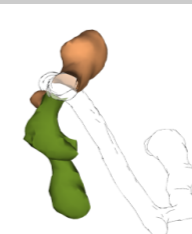

Cranial view

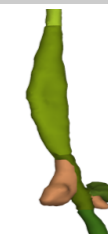

Dorsal view

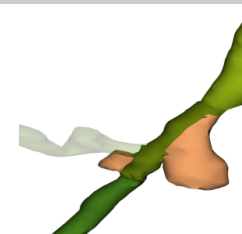

Detail

# Carnegie stage 15 (35-38 days, 6.6 mm) specimen 3512

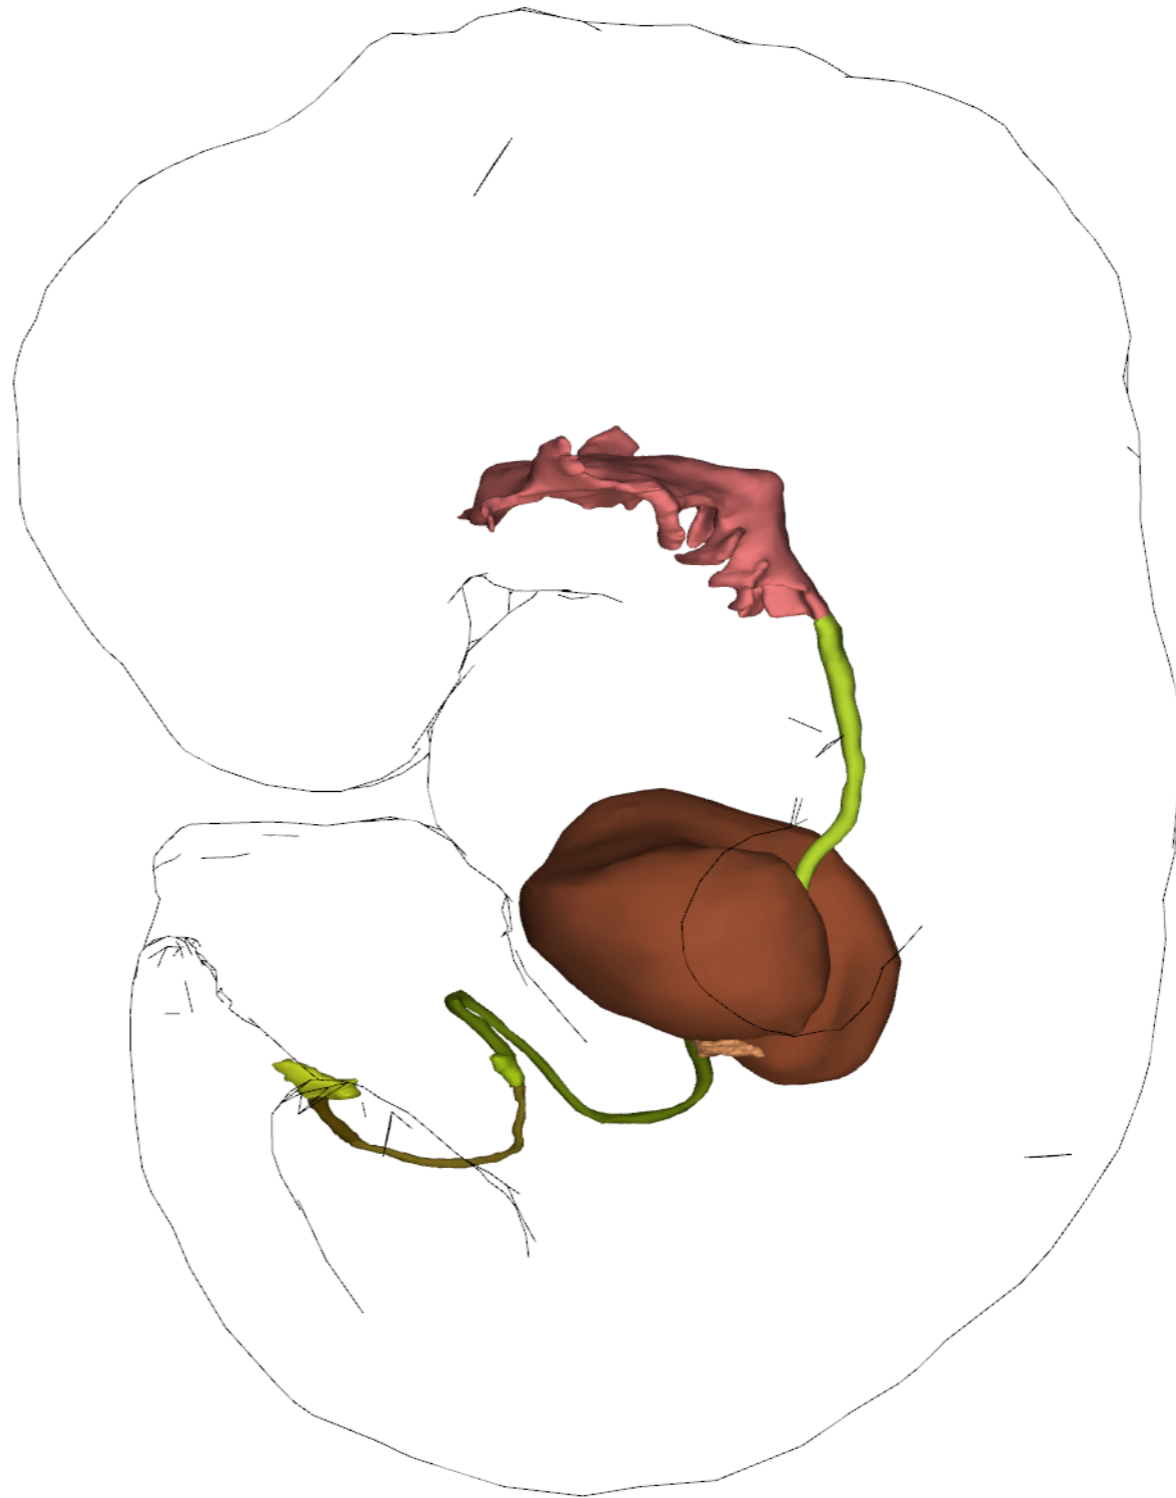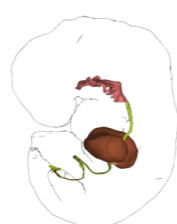

Overview

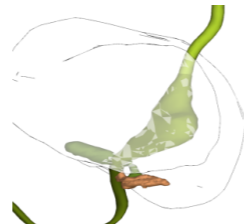

Lateral view

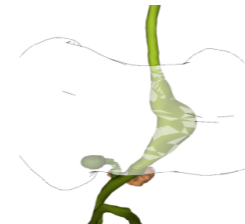

Ventral view

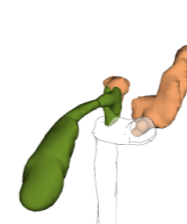

Cranial view

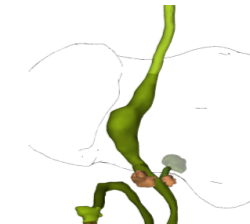

Dorsal view

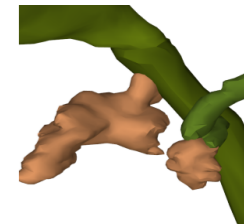

Detail

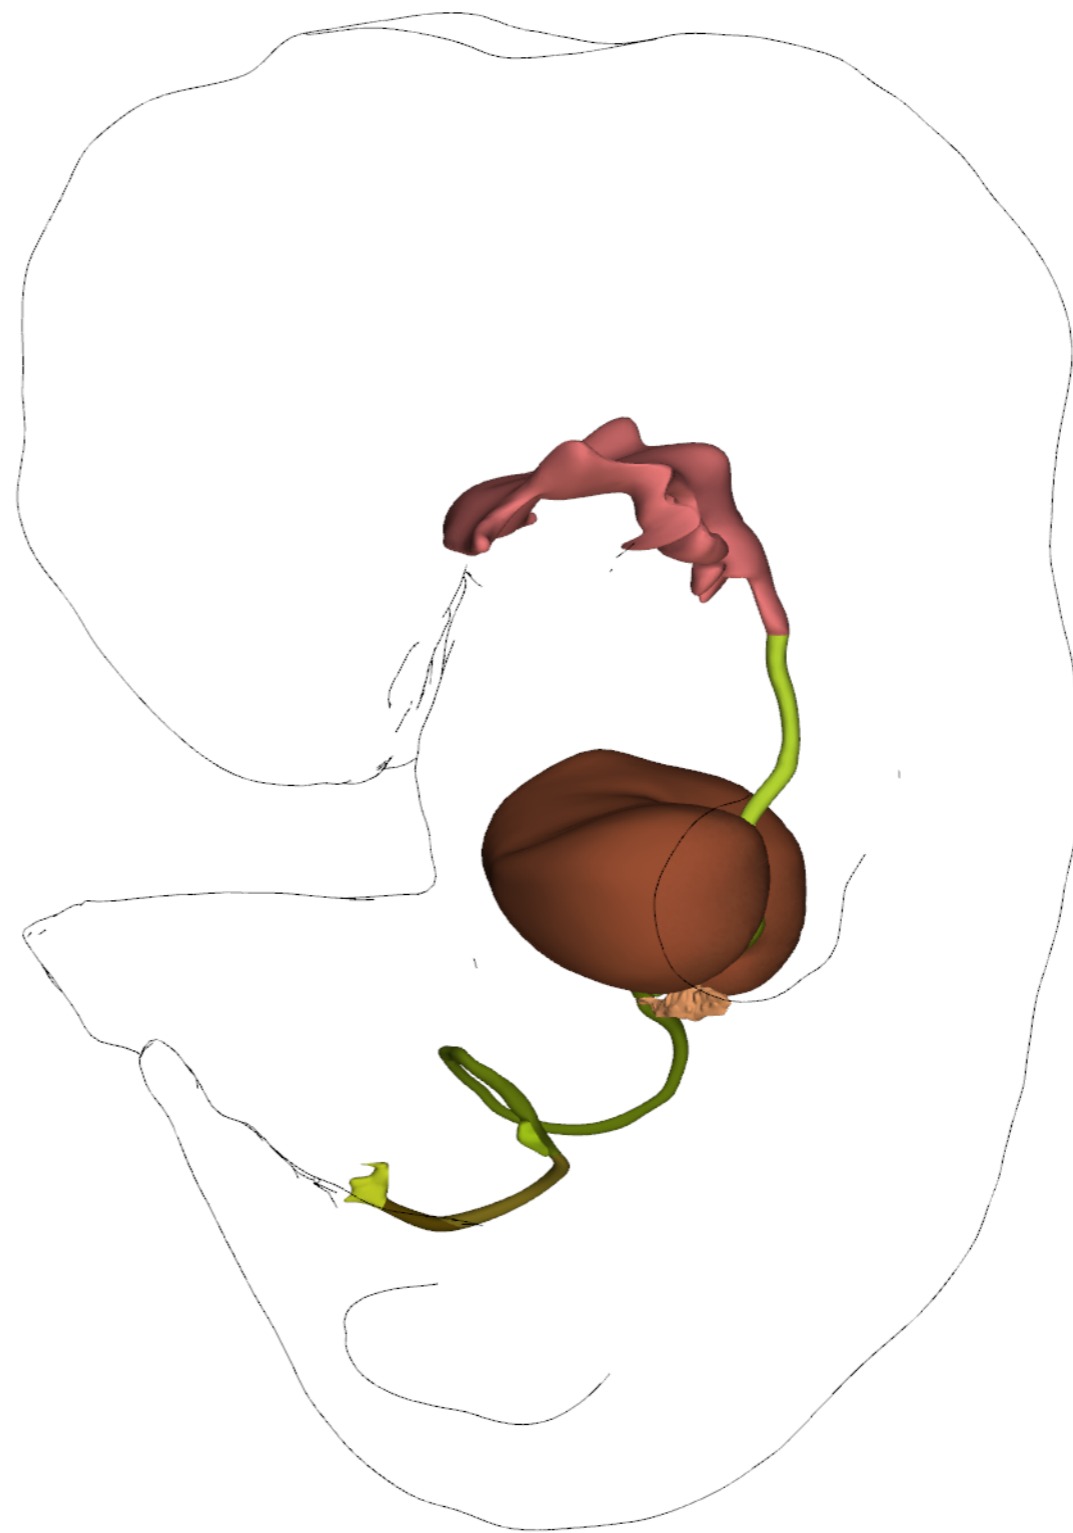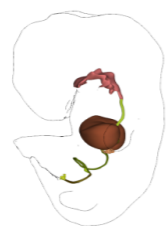

Overview

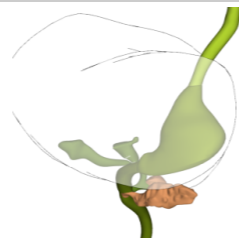

Lateral view

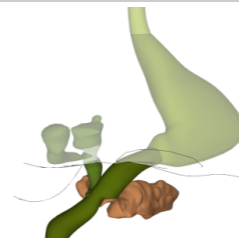

Ventral view

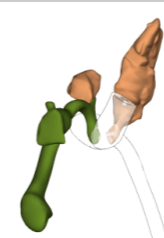

Cranial view

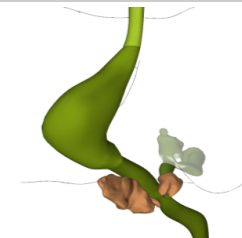

Dorsal view

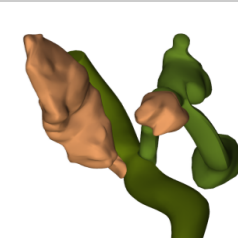

Detail

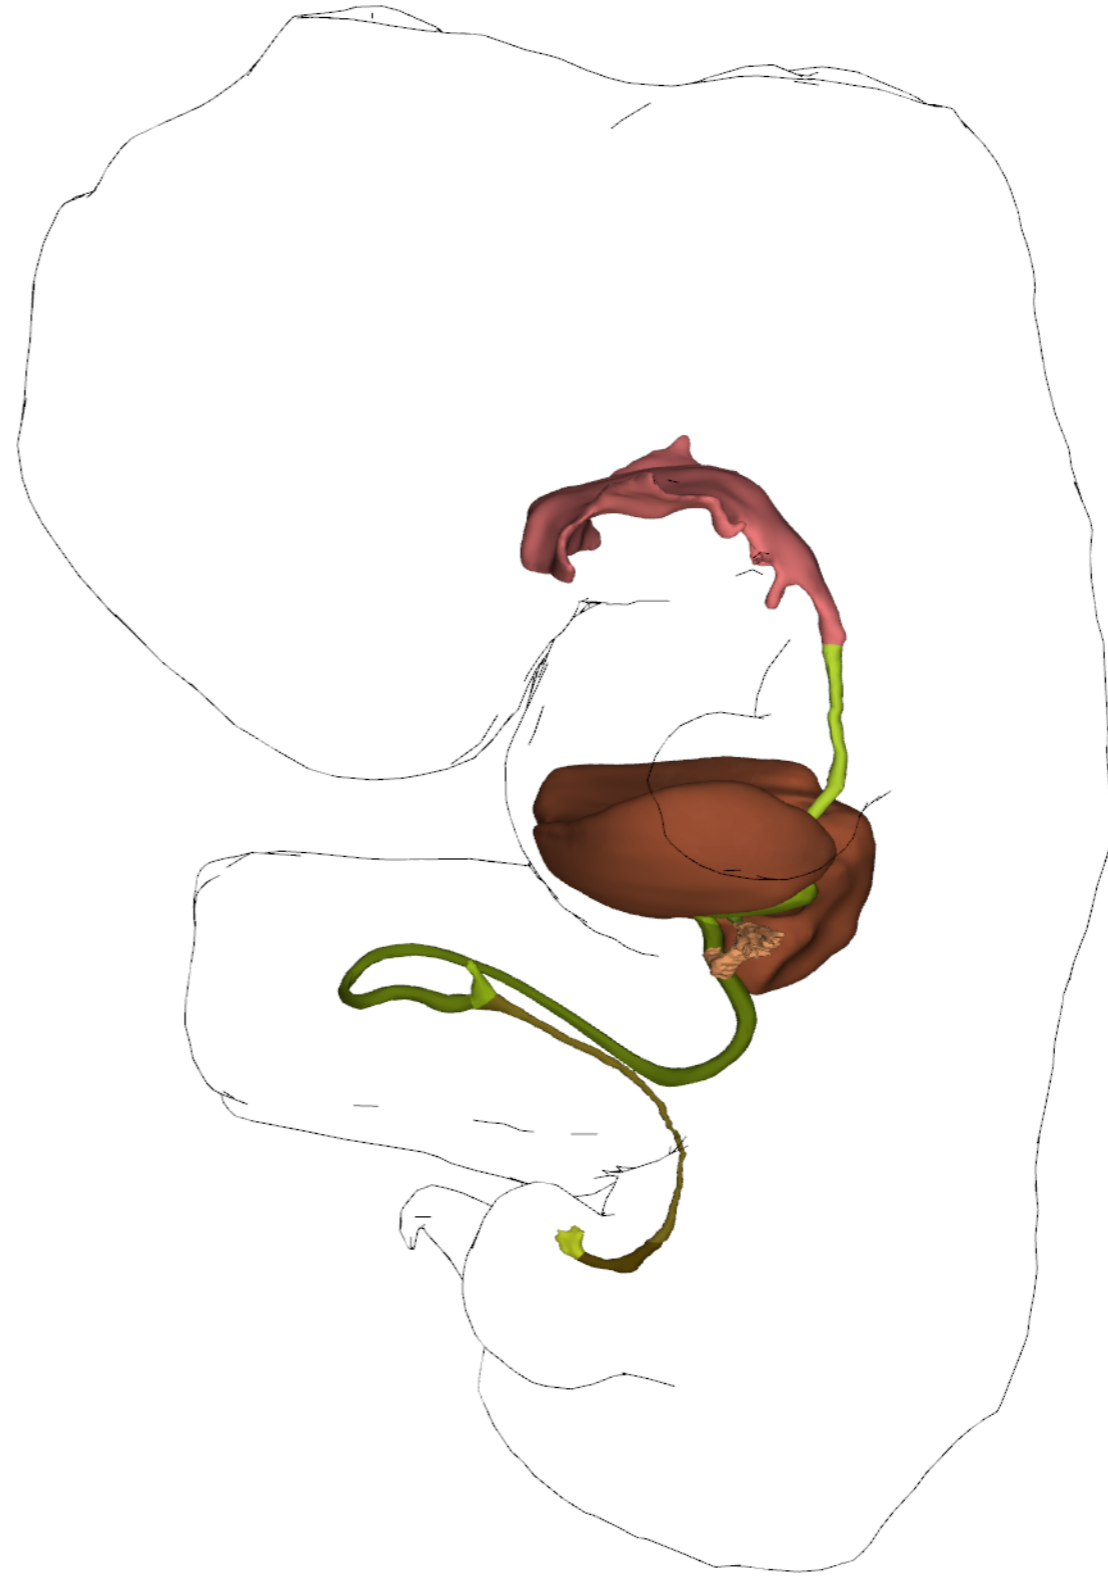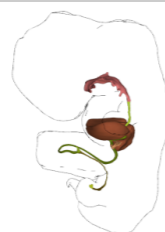

Overview

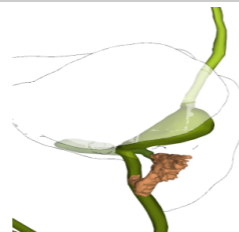

Lateral view

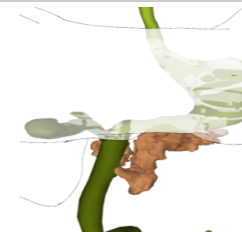

Ventral view

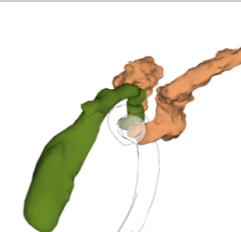

Cranial view

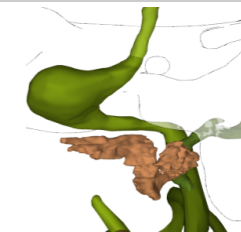

Dorsal view

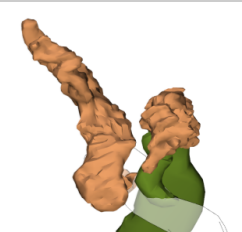

Detail

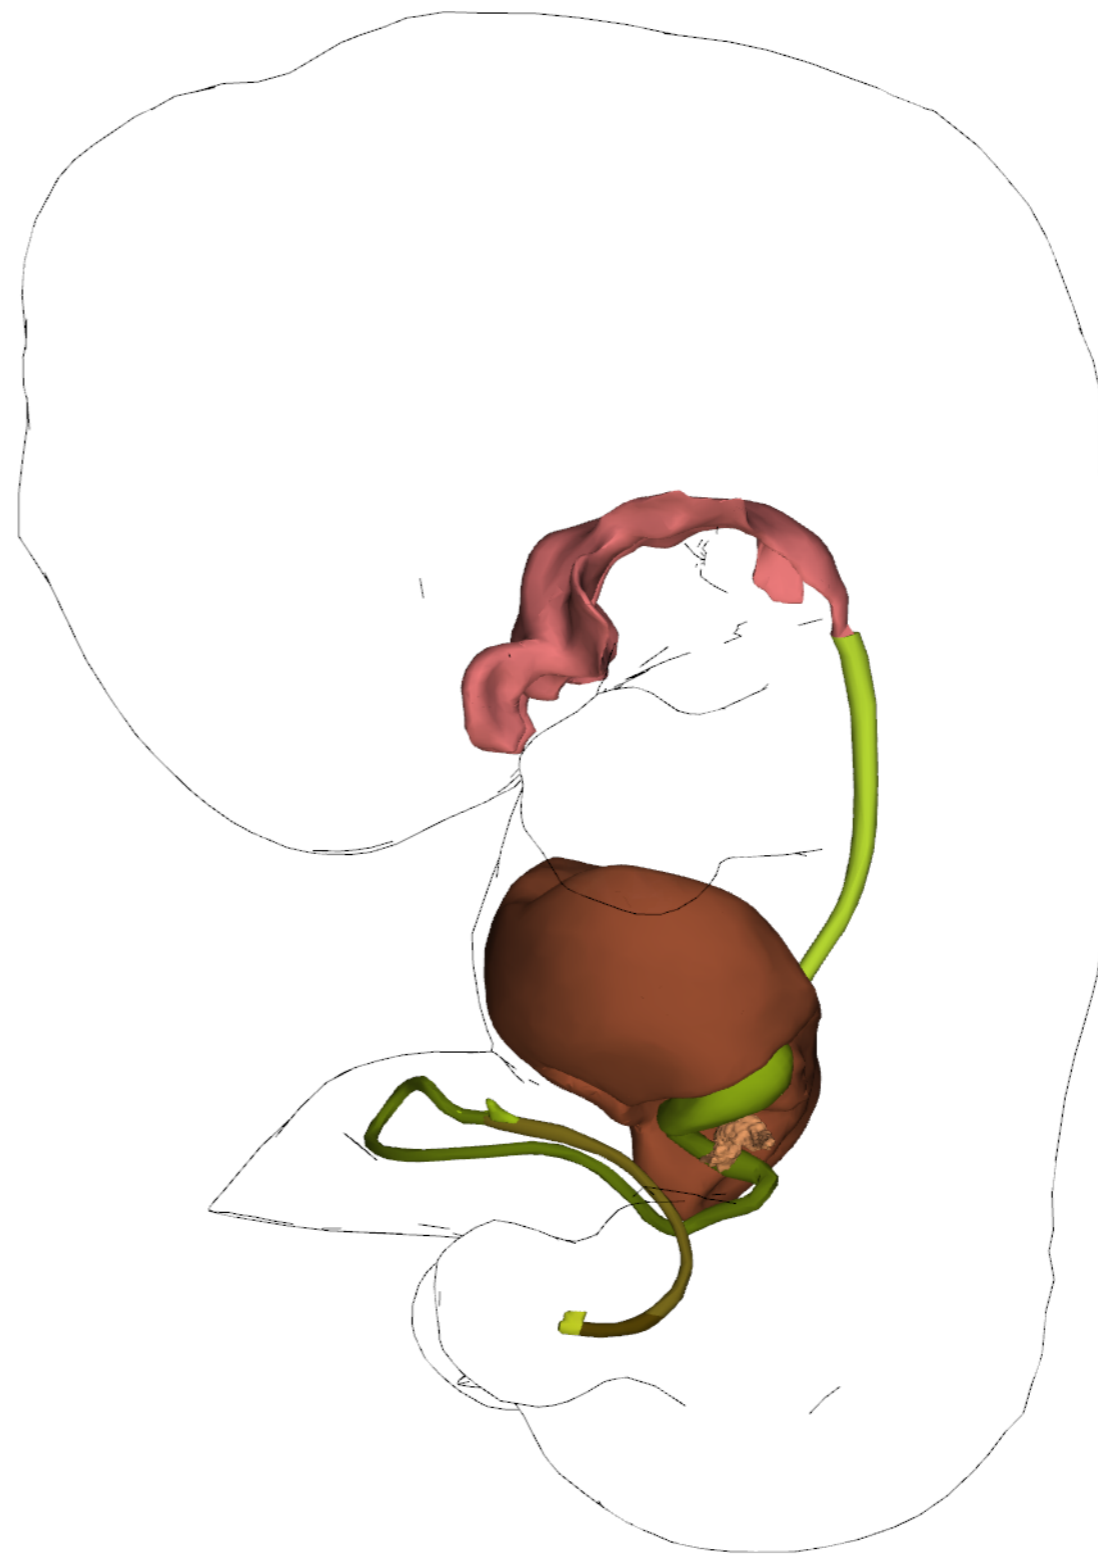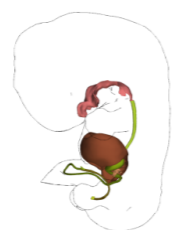

Overview

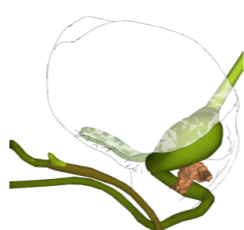

Lateral view

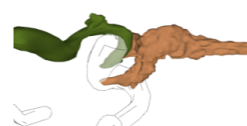

Ventral view

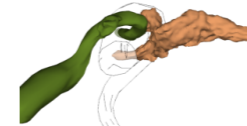

Cranial view

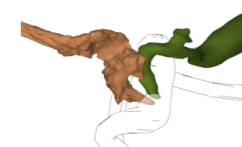

Dorsal view

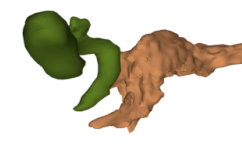

Detail

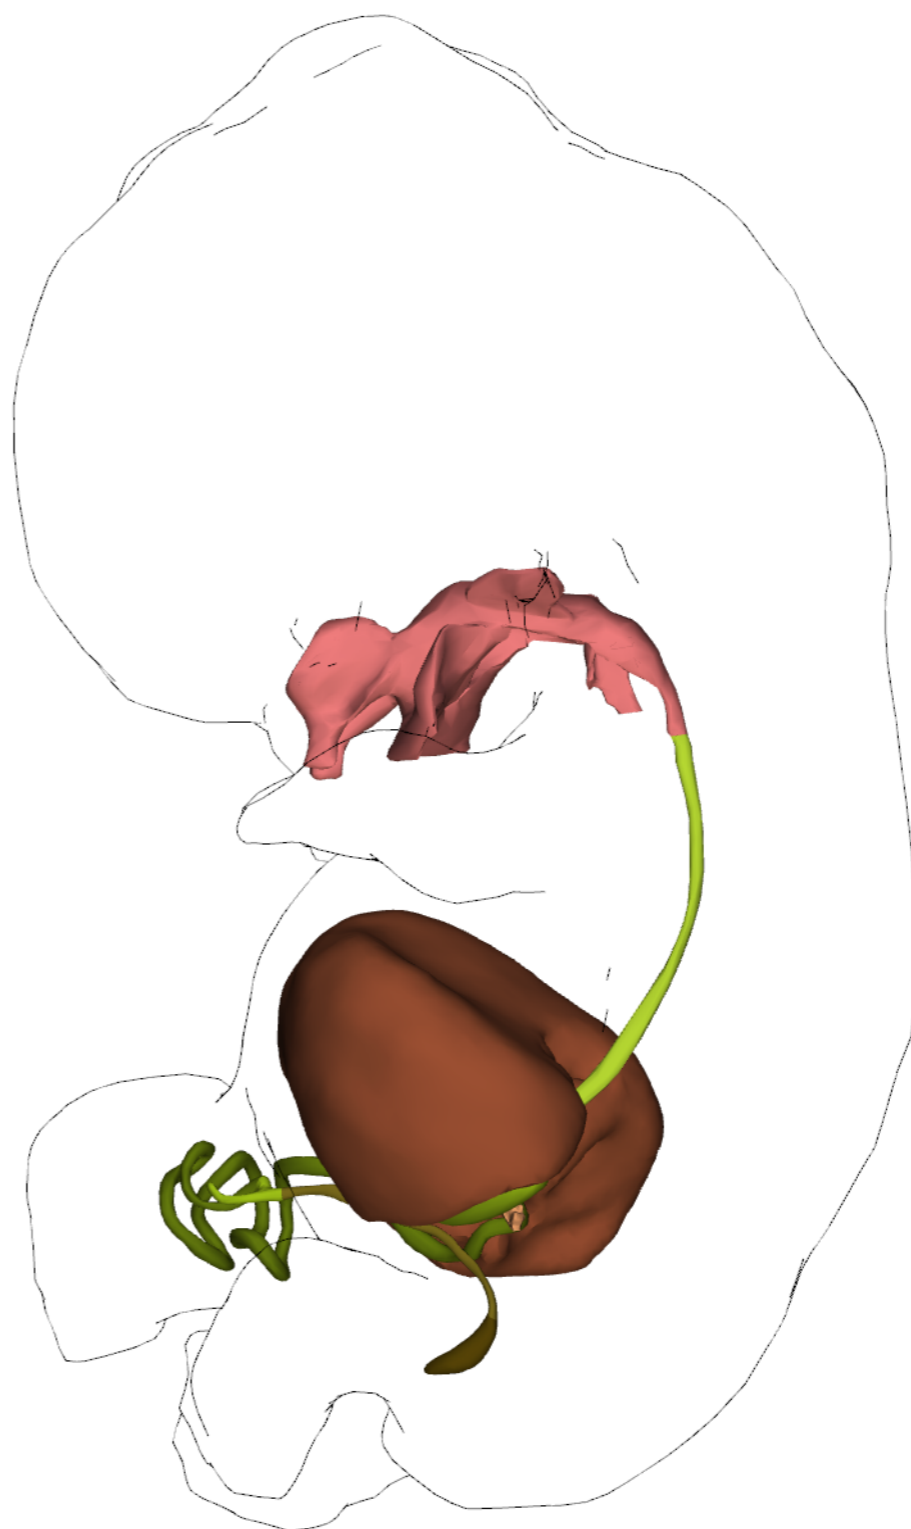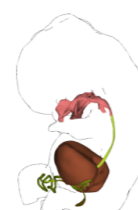

Overview

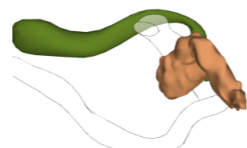

Lateral view

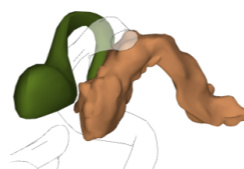

Ventral view

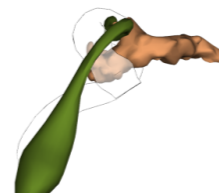

Cranial view

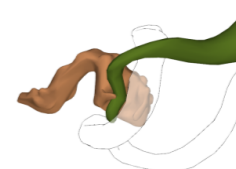

Dorsal view

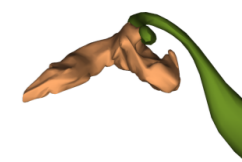

Detail



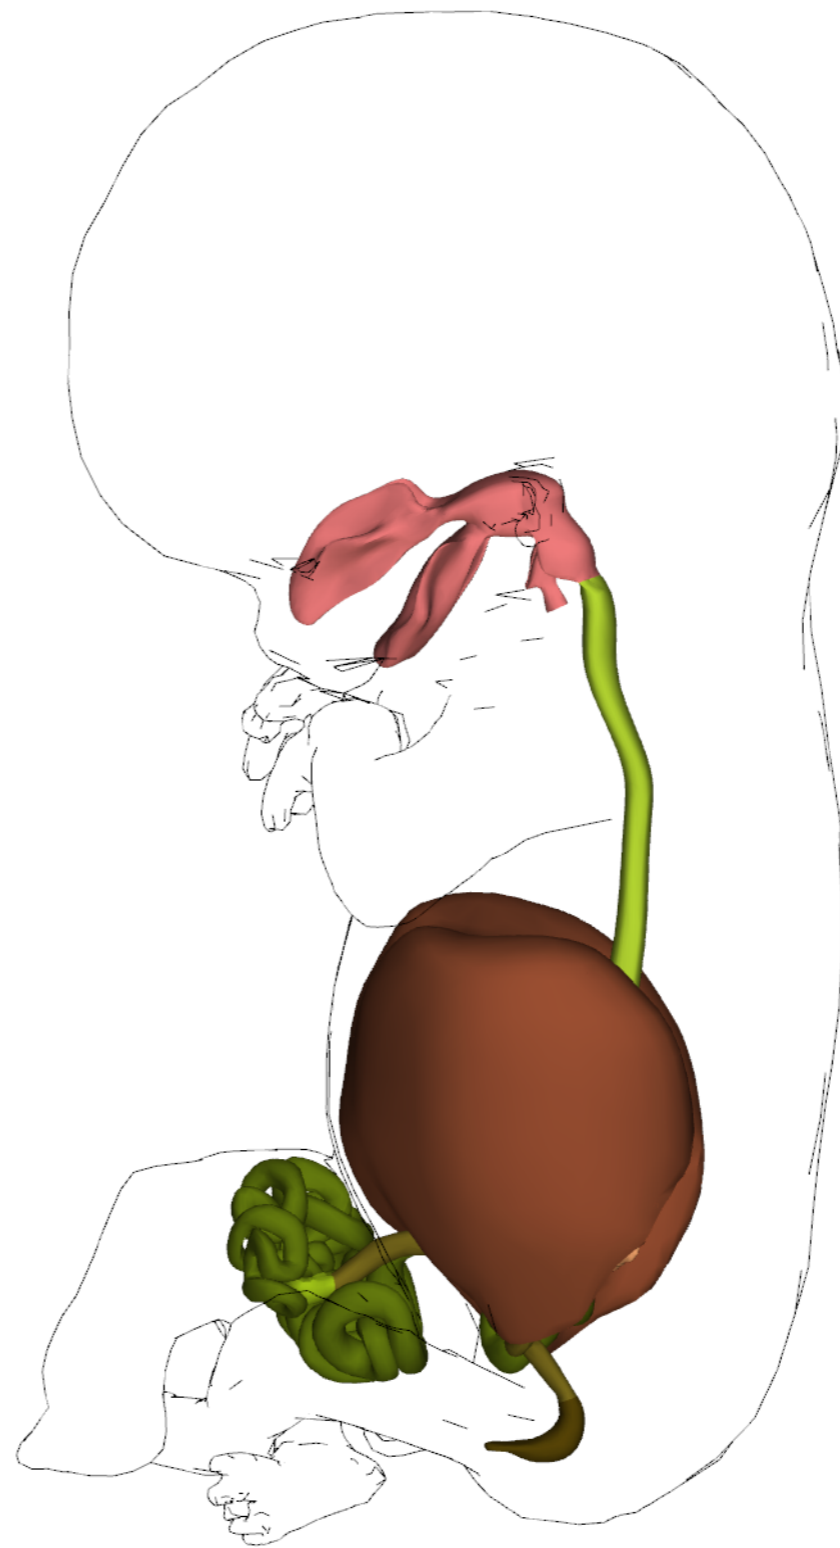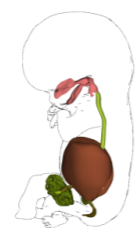

Overview

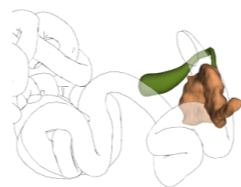

Lateral view

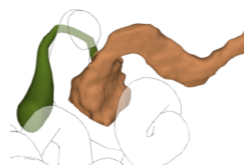

Ventral view

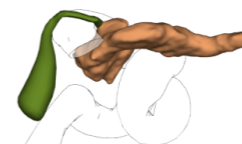

Cranial view

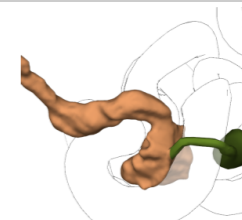

Dorsal view

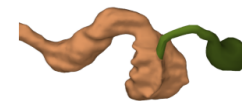

Detail
